# Supplementary material for: Induced surface fluxes: a new framework for attributing Arctic sea ice volume balance biases to specific model errors
Source: Copernicus journal article supplement (doi:10.5194/tc-13-2001-2019), 2019-07-19
Supplement: Supplementary file [file tc-13-2001-2019-supplement-title-page.pdf › tc-13-2001-2019-supplement-title-page.pdf]

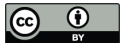

## *Supplement of*

# **Induced surface fluxes: a new framework for attributing Arctic sea ice volume balance biases to specific model errors**

Alex West et al.

*Correspondence to:* Alex E. West ([alex.west@metoffice.gov.uk](mailto:alex.west@metoffice.gov.uk))

- [tc-13-2001-2019-supplement-title-page.pdf](#)
- Submission
  - Analysis
    - \* [.access](#)
    - \* [calculate\\_cross\\_anomalies.py](#)
    - \* [simulate\\_daily\\_covariance.py](#)
    - \* [winter\\_proportion.py](#)
  - [Figure\\_S1\\_ice\\_thickness\\_distribution\\_transformation.png](#)
  - Figures
    - \* [.access](#)
    - \* [F1\\_Arctic\\_Ocean.py](#)
    - \* [F2\\_sea\\_ice\\_evaluation.py](#)
    - \* [F3\\_spatial\\_amplification.py](#)
    - \* [F4\\_sfcrad\\_evaluation.py](#)
    - \* [F5\\_melt\\_onset.py](#)
    - \* [F6\\_illustrate\\_isf.py](#)
    - \* [F6\\_plot\\_isf.py](#)
    - \* [F7\\_plot\\_isf.py](#)
    - \* [F8\\_annual\\_total\\_cpts.py](#)
    - \* [F9\\_winter\\_cloud\\_bias.py](#)
    - \* [FB1\\_evaluate\\_formulae.py](#)
  - ISF
    - \* [.access](#)
    - \* [combine\\_ice\\_thickness.py](#)
    - \* [compute\\_auxiliary\\_variables.py](#)
    - \* [compute\\_complex\\_scale\\_factor.py](#)

- \* compute\_scaled\_cat\_thickness\_year.py
- \* isf.py
- \* isf\_input.txt
- \* isf\_obs.txt
- \* make\_combined\_ice\_thickness\_contribution.py
- \* make\_flux\_contributions.py
- Library
  - \* .access
  - \* arrays.py
  - \* cl\_modis.py
  - \* cube\_magic.py
  - \* regions.py
  - \* sheba.py
  - \* timemod.py
- Tables
  - \* .access
  - \* Table1\_isf\_vals.py

The copyright of individual parts of the supplement might differ from the CC BY 4.0 License.
